# Supplementary material for: Molecular subtyping of glioblastoma based on immune-related genes for prognosis
Source: PubMed Central journal article supplement (PMC7511296; doi:10.1038/s41598-020-72488-4), 2020-09-23
Supplement: 41598_2020_72488_MOESM1_ESM.pdf [file 41598_2020_72488_MOESM1_ESM.pdf]

## Supplementary Fig. S1

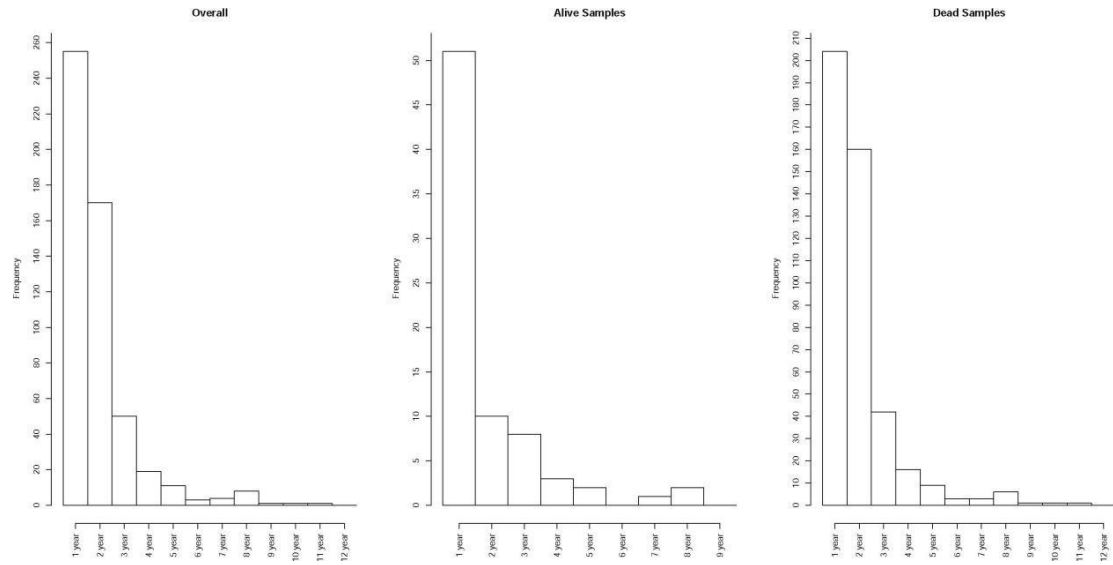

**Supplementary Fig. S1. The distribution of follow-up period in GBM samples (overall samples, alive samples and dead samples).**

## Supplementary Fig. S2

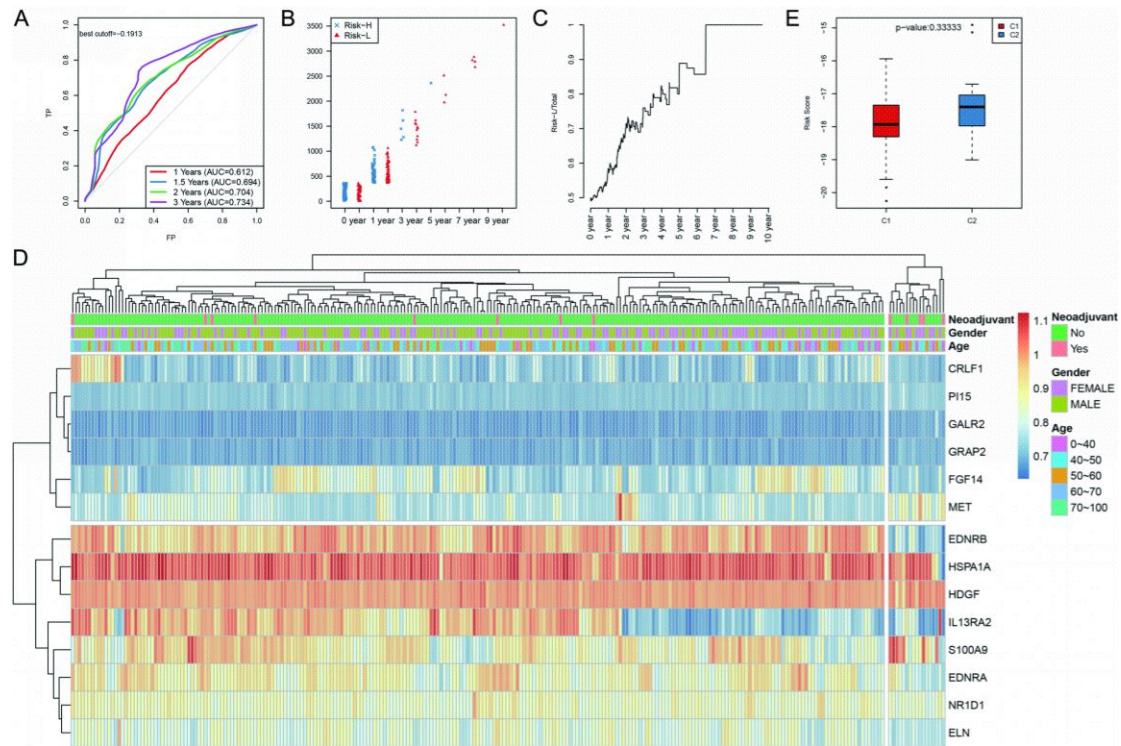

**Supplementary Fig. S2. Verify the reliability of the prognosis prediction model included 14 immune-related genes for GBM patients in test set. (A)** The survival predicted ROC curves of 14-gene risk model in test set. **(B)** The distribution of samples in Risk-H and Risk-L groups of test set divided through 14-gene risk model under different OS. **(C)** The level of Risk-L group/Total sample size with the extension in OS in the test set. **(D)** The clustering results of test set samples. **(E)** Difference in the RiskScore between the two groups which had been clustered by the expression of 14 genes of test set samples.

### Supplementary Fig. S3

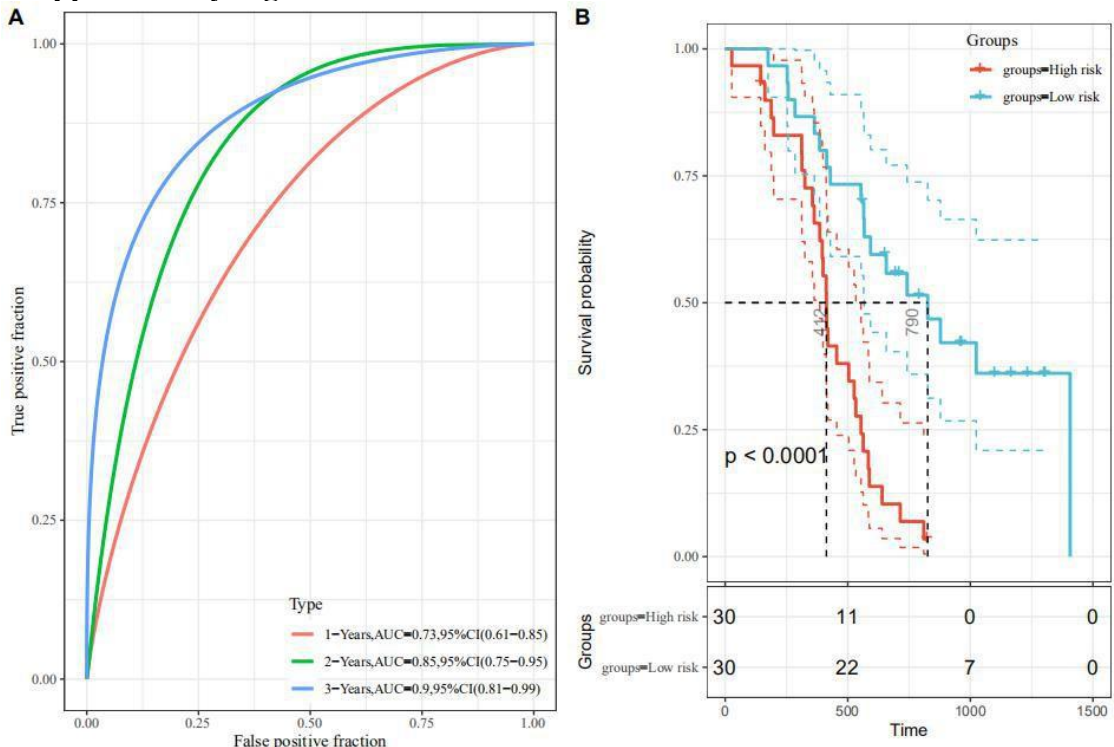

**Supplementary Fig. S3. Verification of the reliability of the prognosis prediction model including 14 immune-related genes for GBM patients in the GEO database GSE74187. (A) The survival prediction ROC curves of the 14-gene risk model in the GSE74187 set. (B) The distribution of samples in Risk-H and Risk-L groups of the GSE74187 set was done using the 14-gene risk model under different OS.**

## Supplementary Fig. S4

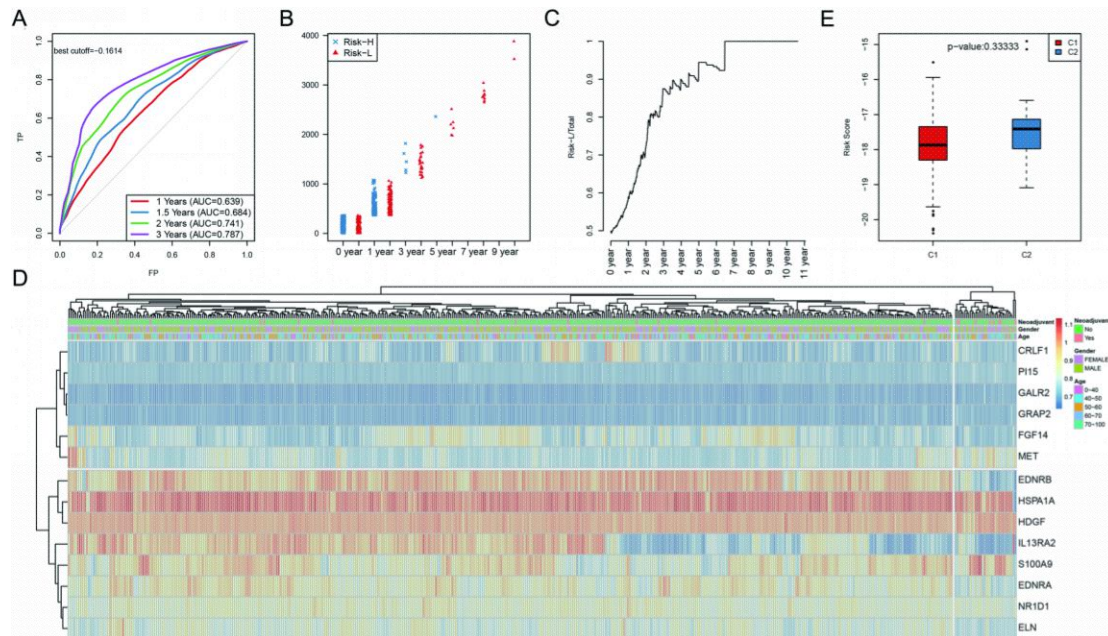

**Supplementary Fig. S4. Verify the stability of the prognosis prediction model included 14 immune-related genes for all the samples. (A)** The survival predicted ROC curves of 14-gene risk model. **(B)** The distribution of samples in Risk-H and Risk-L groups divided through 14-gene risk model under different OS. **(C)** The level of Risk-L group/Total sample size with the extension in OS. **(D)** The clustering results of all the samples. **(E)** Difference in the RiskScore between the two groups which had been clustered by the expression of 14 genes.

### Supplementary Fig. S5

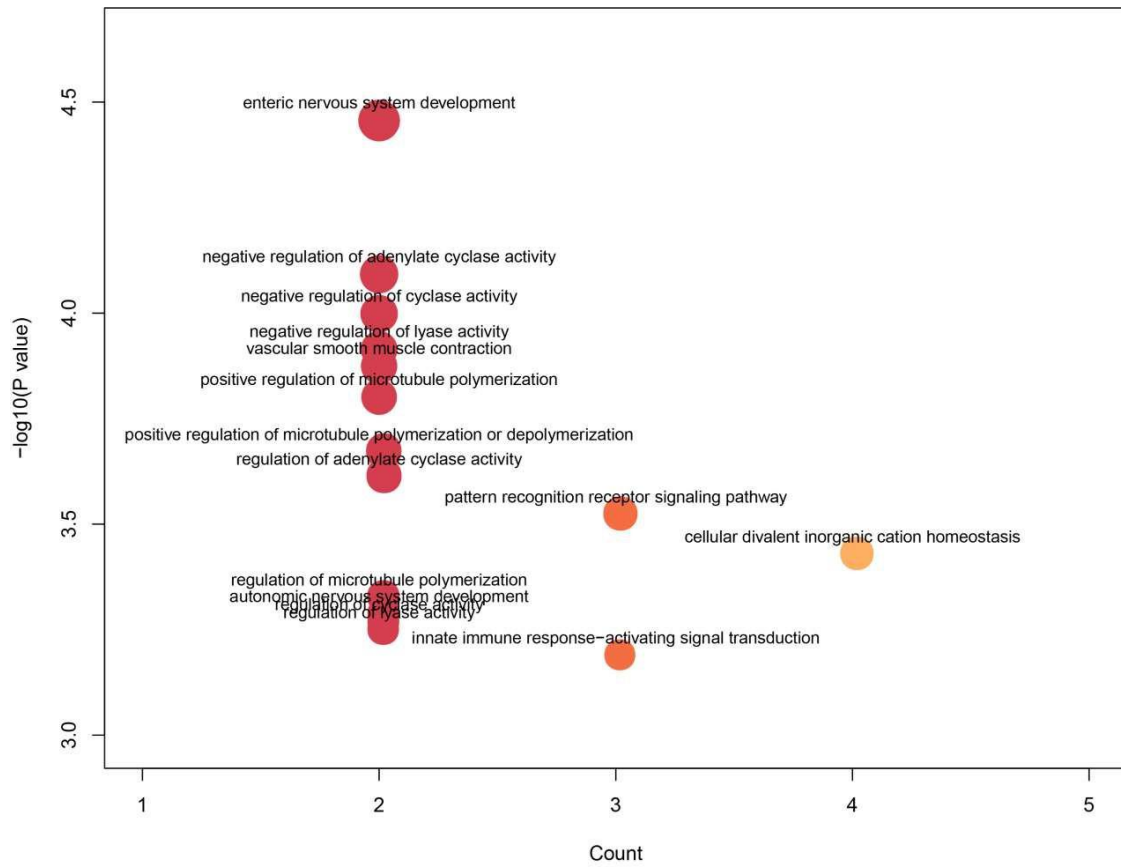

**Supplementary Fig. S5. The GO enrichment analysis of the 14 specific immune-related genes.**
